# Supplementary material for: Fidaxomicin jams Mycobacterium tuberculosis RNA polymerase motions needed for initiation via RbpA contacts
Source: eLife journal article supplement (doi:10.7554/elife.34823), 2018-02-26
Supplement: supp [file elife-34823-supp-v1.zip]

Archive with 8 entries (8 files):
- elife_poa_e34823_Transparent_Reporting_File.pdf
- elife_poa_e34823_Figure_1_figure_supplement_2.jpg
- elife_poa_e34823_Figure_5_figure_supplement_1.jpg
- elife_poa_e34823_Figure_1_figure_supplement_1.jpg
- elife_poa_e34823_Supplementary_File_1.docx
- elife_poa_e34823_Supplementary_File_2.docx
- elife_poa_e34823_Figure_1_figure_supplement_3.jpg
- elife_poa_e34823_Figure_2_figure_supplement_1.jpg
