# Supplementary material for: Fidaxomicin jams Mycobacterium tuberculosis RNA polymerase motions needed for initiation via RbpA contacts
Source: eLife journal article supplement (doi:10.7554/elife.34823), 2018-02-26
Supplement: supp [file elife-34823-supp-v1.zip › elife_poa_e34823_Supplementary_File_1.docx]

**Supplementary file 1. Model statistics.**

|  | Fdx/RbpA/A-holo/us-fork | RbpA/A-holo/(us-fork)2 |
| --- | --- | --- |
| Resolutiona | 3.38 Å | 3.27 Å |
| Molprobity score | 2.29 | 2.42 |
| Clashscore (all atoms) | 10.79 | 5.88 |
| Rotamer outliers | 7.13% | 13.48% |
| RMS deviations bonds (Å) | 0.002 | 0.007 |
| RMS deviations angles (°) | 0.491 | 0.837 |
| Ramachandran favored | 89.71% | 92.14% |
| Ramachandran outliers | 0.30% | 0.03% |

a Gold standard FSC 0.143 cutoff criteria (Rosenthal and Henderson, 2003).
