# Supplementary material for: Fidaxomicin jams Mycobacterium tuberculosis RNA polymerase motions needed for initiation via RbpA contacts
Source: eLife journal article supplement (doi:10.7554/elife.34823), 2018-02-26
Supplement: supp [file elife-34823-supp-v1.zip › elife_poa_e34823_Supplementary_File_2.docx]

**Supplementary file 2. Superimposition of cryo-EM structures.**

| structure | total # of C's aligned (structural core)a | rmsd (Å) (structural core alignment) | clampb rmsd (Å) (461 C's) |
| --- | --- | --- | --- |
| RbpA/A-holo/(us-fork)2 (reference) | 1,034 | 0 | 0 |
| RbpA/A-holo | 900 | 0.386 | 9.01 |
| Fdx/RbpA/A-holo/us-fork | 898 | 0.384 | 12.4 |
| Fdx/RbpA/A-holo | 900 | 0.386 | 13.5 |

aStructural core module:  residues 30-53, 177-182, 370-380, 445-639, 705-747, 879-1116; ' 414-443, 496-863, 1247-1282; .

bClamp module:  residues 1117-1140; ' residues 1-140, 231-413, 1219-1245.
