# Supplementary figures and images for: Fidaxomicin jams Mycobacterium tuberculosis RNA polymerase motions needed for initiation via RbpA contacts
Source: eLife journal article supplement (doi:10.7554/elife.34823), 2018-02-26

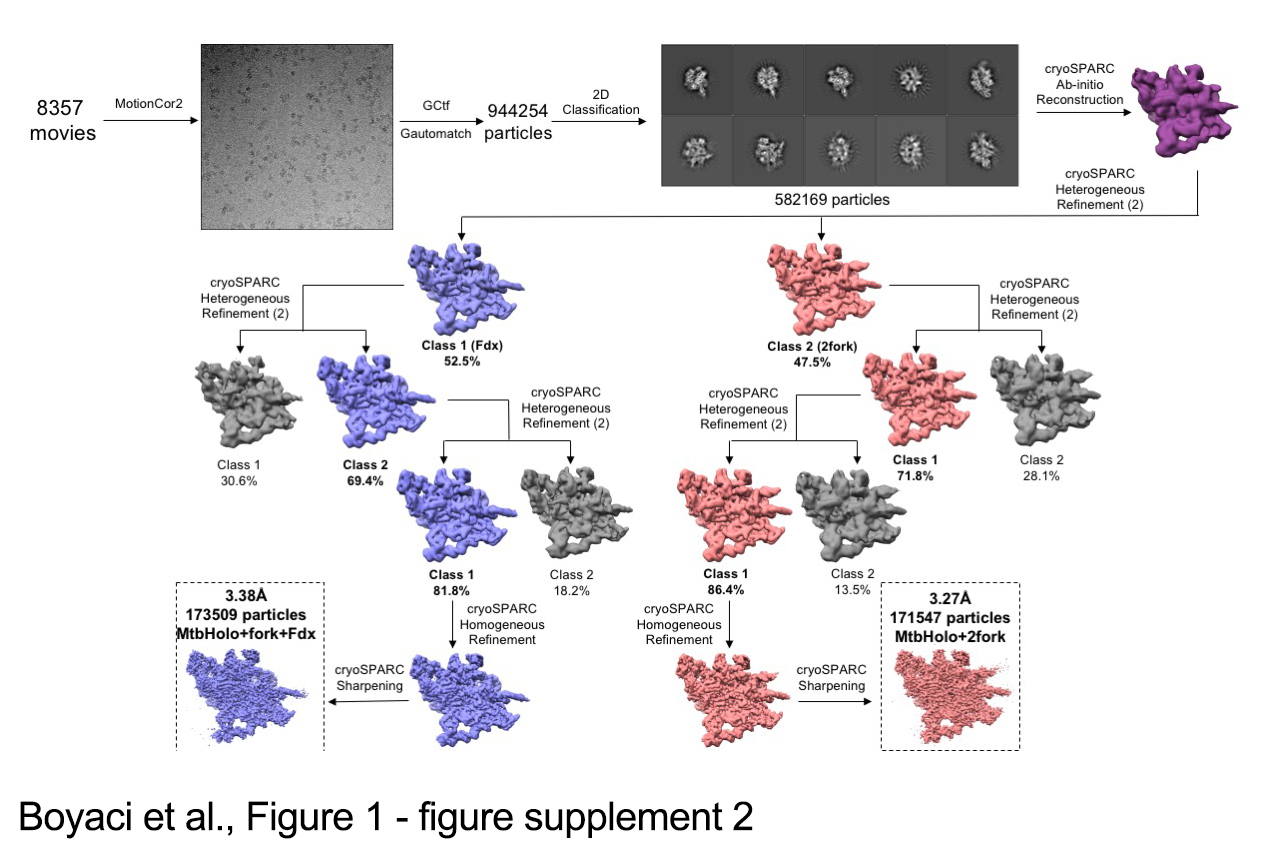

Supplement: supp [file elife-34823-supp-v1.zip › elife_poa_e34823_Figure_1_figure_supplement_2.jpg]

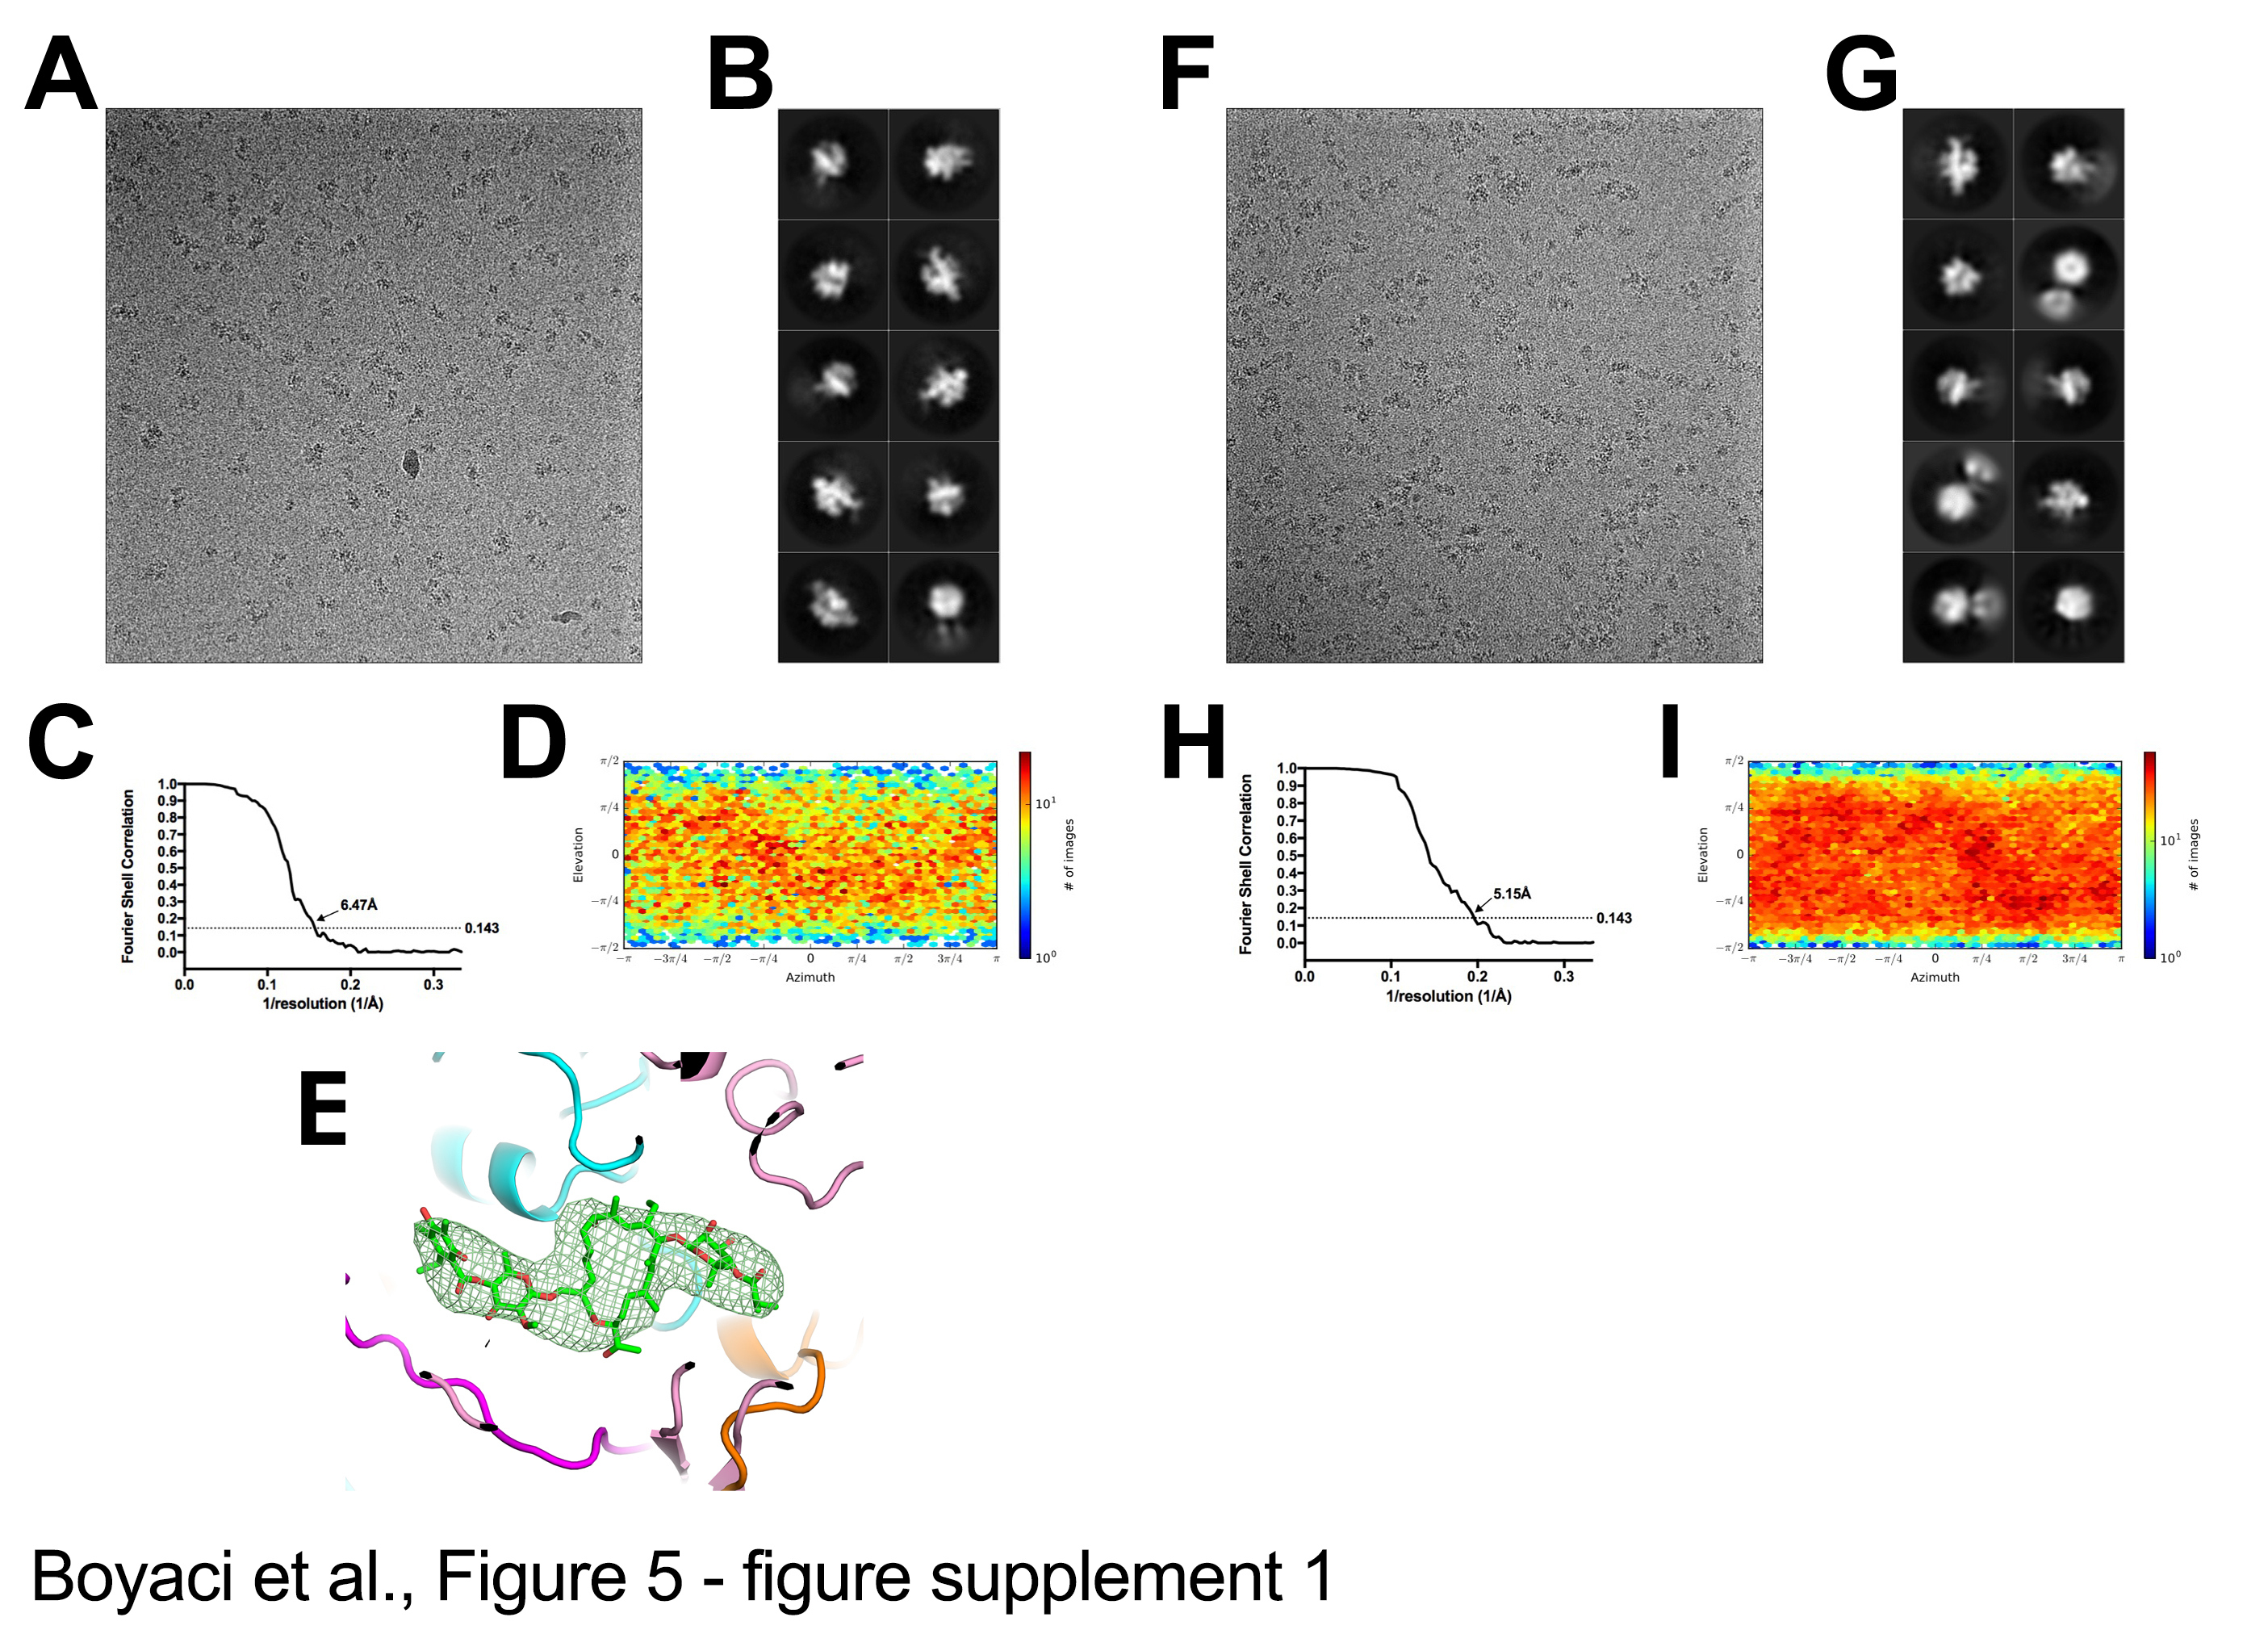

Supplement: supp [file elife-34823-supp-v1.zip › elife_poa_e34823_Figure_5_figure_supplement_1.jpg]

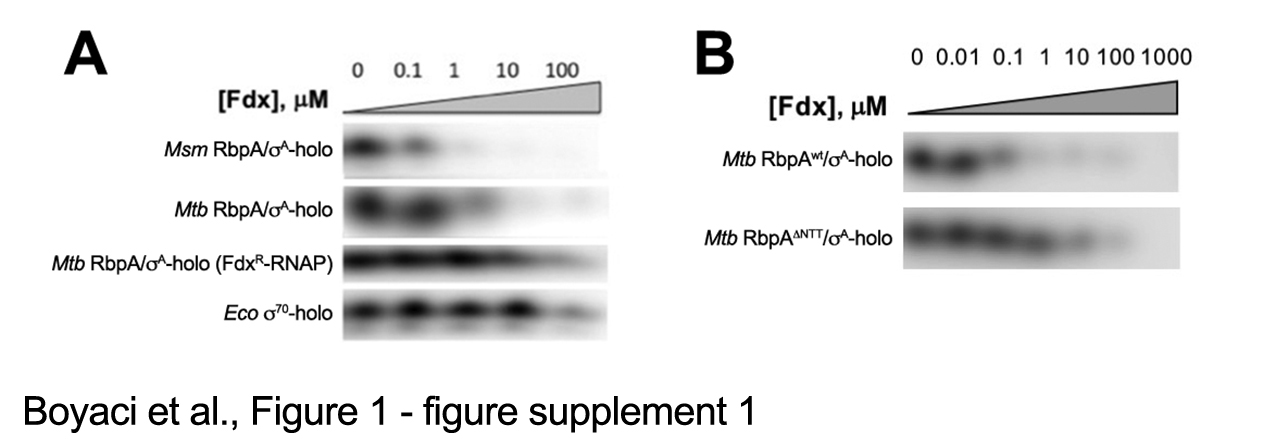

Supplement: supp [file elife-34823-supp-v1.zip › elife_poa_e34823_Figure_1_figure_supplement_1.jpg]

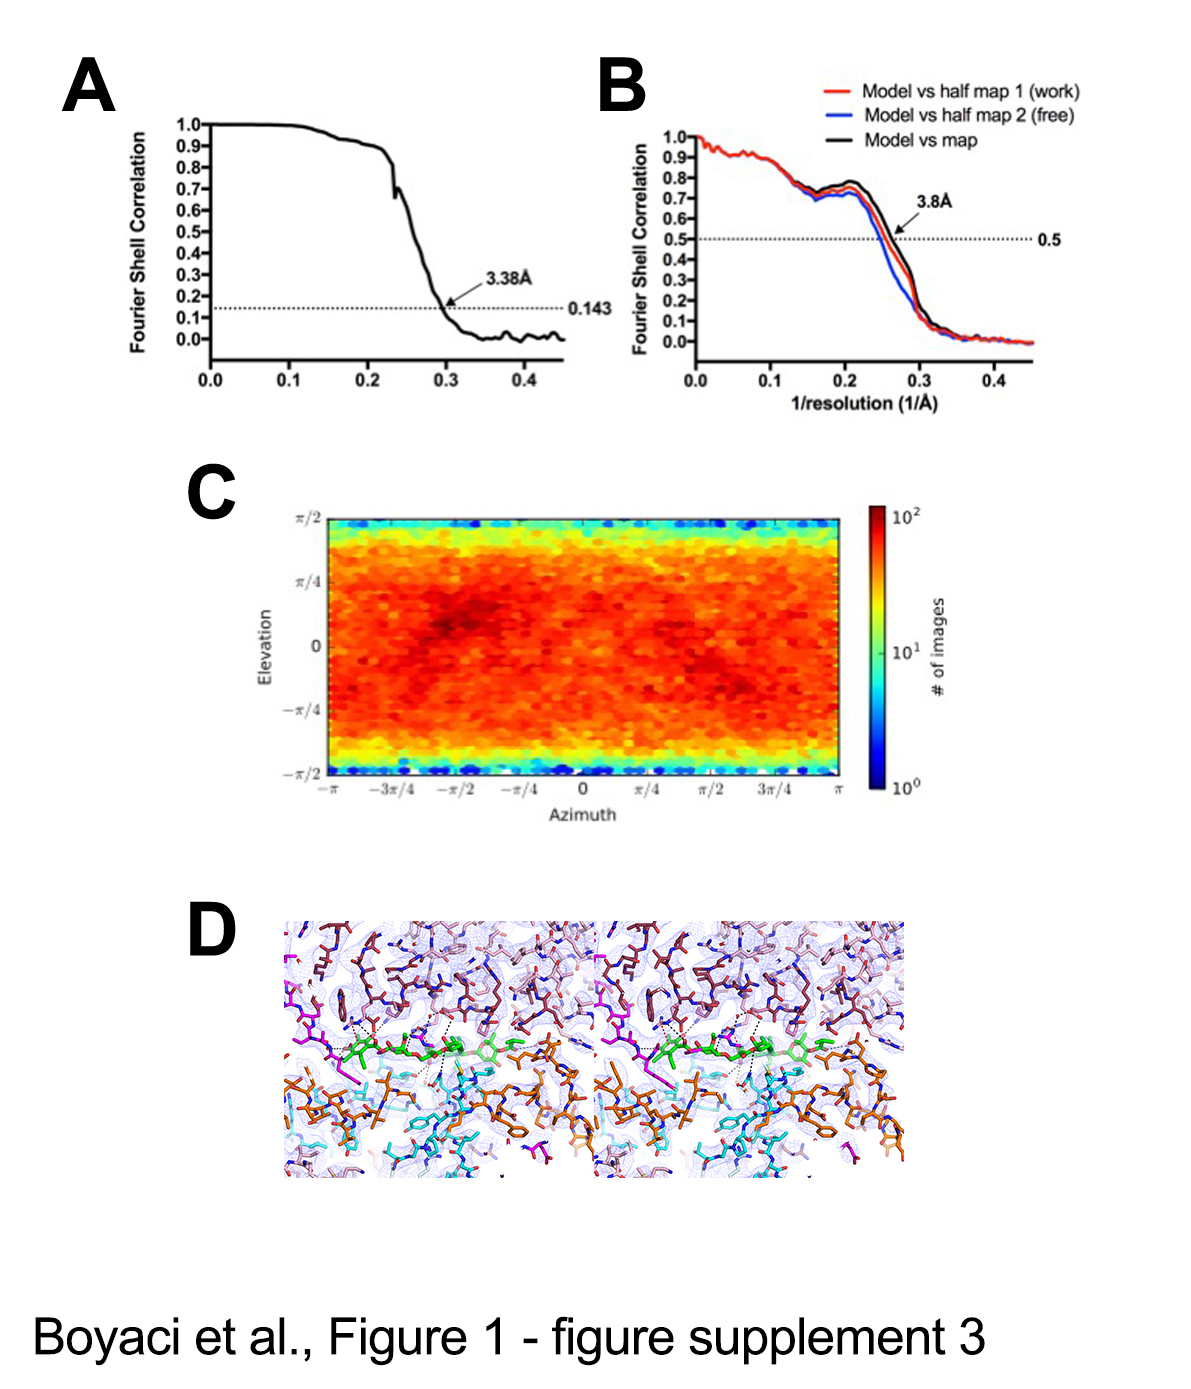

Supplement: supp [file elife-34823-supp-v1.zip › elife_poa_e34823_Figure_1_figure_supplement_3.jpg]

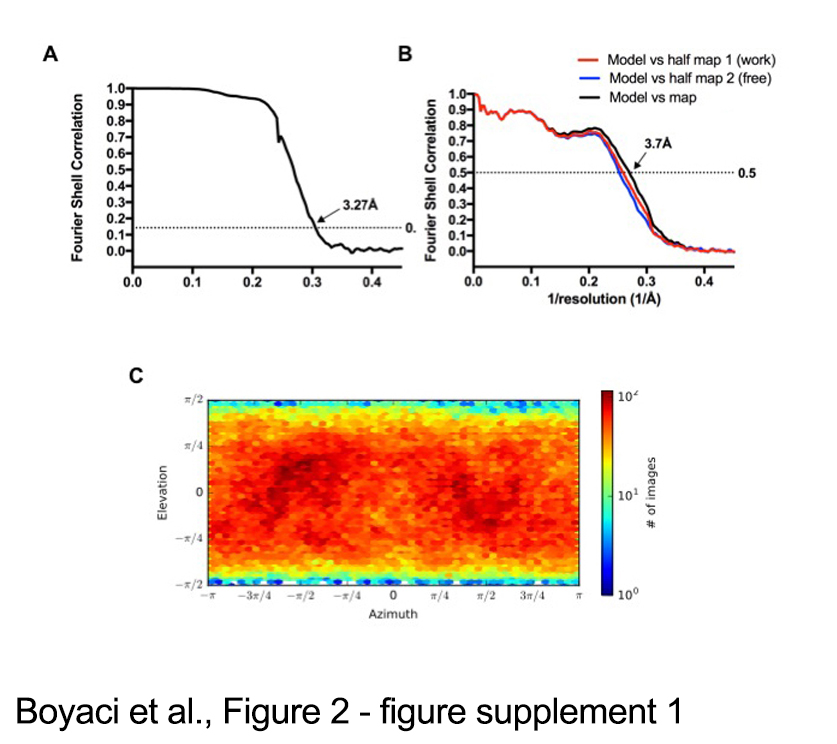

Supplement: supp [file elife-34823-supp-v1.zip › elife_poa_e34823_Figure_2_figure_supplement_1.jpg]
